# Supplementary material for: New homoleptic iridium complexes with C∧NN type ligand for high efficiency orange and single emissive-layer white OLEDs
Source: Royal Society of Chemistry journal article supplement (doi:10.1039/c5tc00458f), 2015-01-01
Supplement: c5tc00458f1.pdf [file c5tc00458f1.pdf]

## Supporting Information

### New Homoleptic Iridium Complexes with C<sup>^</sup>N=N Type Ligand for High Efficiency Orange and Single Emissive-layer White OLEDs

Li Yuan Guo,<sup>†a</sup> Xun Lu Zhang,<sup>†a</sup> Hai Shan Wang,<sup>a</sup> Chen Liu,<sup>a</sup> Zhi Gang Li,<sup>b</sup> Zhang Jin Liao,<sup>b</sup> Bao Xiu Mi,<sup>\*a</sup> Xin Hui Zhou,<sup>b</sup> Chao Zheng,<sup>a</sup> Yong Hua Li<sup>a</sup> and Zhi Qiang Gao<sup>\*b</sup>

#### ADDITIONAL TABLE AND FIGURES

**Table S1.** Photophysical, thermal and electrochemical properties of the two complexes

| Complex               | IrCzPPya | IrNPPya |
|-----------------------|----------|---------|
| $\lambda_{em}$ (nm)   | 556      | 558     |
| $\Phi_{PL}$           | 0.45     | 0.55    |
| $\tau$ ( $\mu$ s)     | 3.99     | 6.00    |
| $T_d$ ( $^{\circ}$ C) | 426      | 382     |
| HOMO (eV)             | 5.70     | 5.40    |
| LUMO (eV)             | 3.10     | 2.80    |

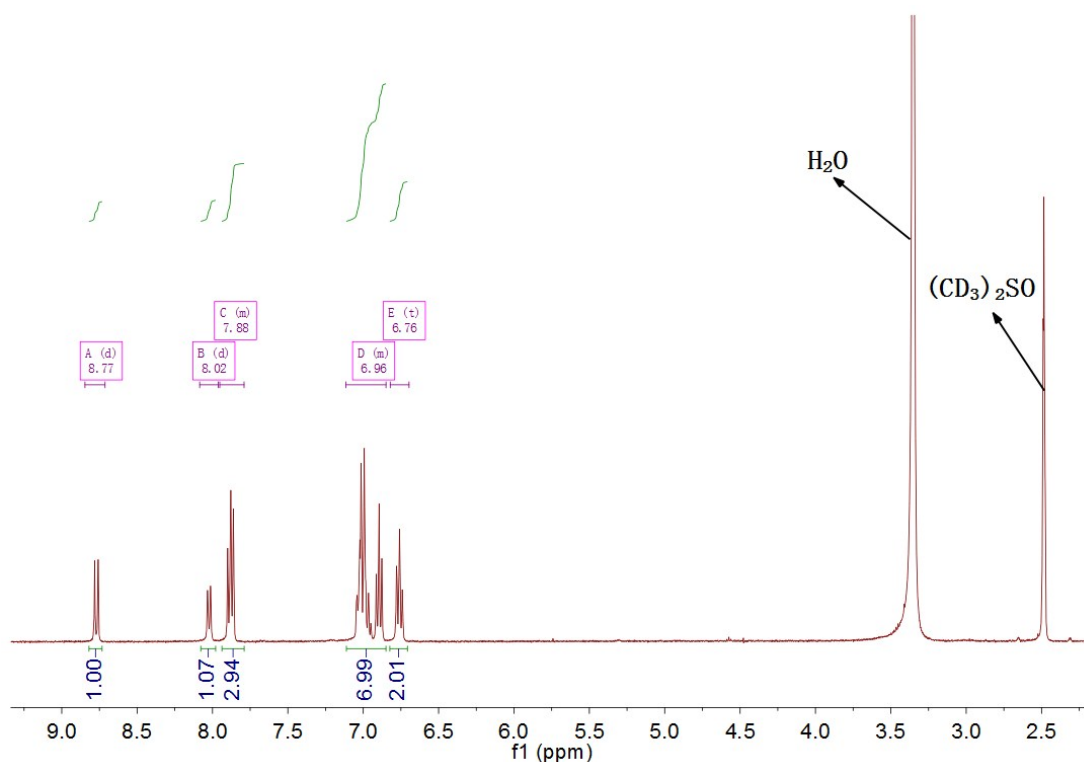

**Fig. S1.** <sup>1</sup>H NMR spectrum of IrCzPPya in (CD<sub>3</sub>)<sub>2</sub>SO.

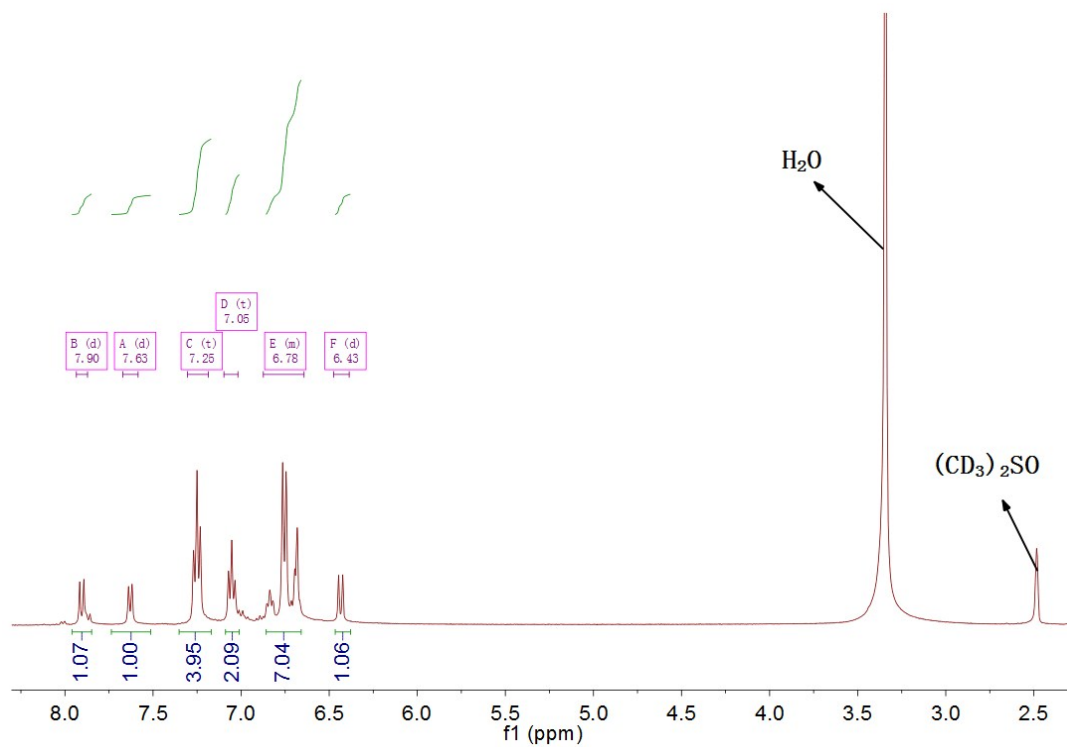

**Fig. S2.**  $^1\text{H}$  NMR spectrum of IrNPPya in  $(\text{CD}_3)_2\text{SO}$ .

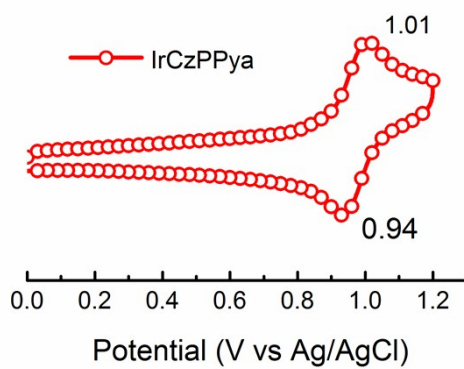

**Fig. S3.** Electrochemical spectra of IrCzPPya.

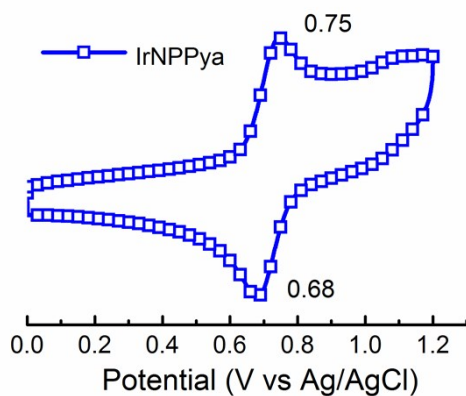

**Fig. S4.** Electrochemical spectra of IrNPPya.

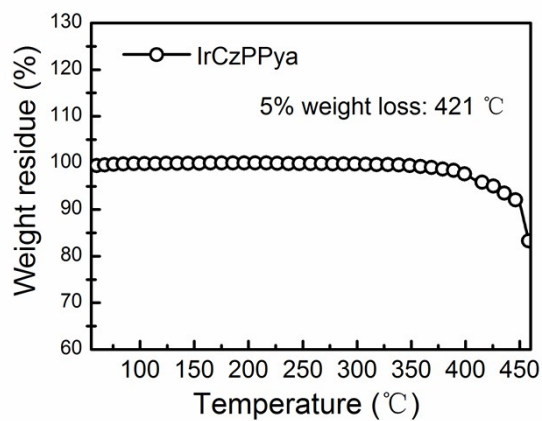

**Fig. S5.** Thermal gravimetric spectra of IrCzPPya.

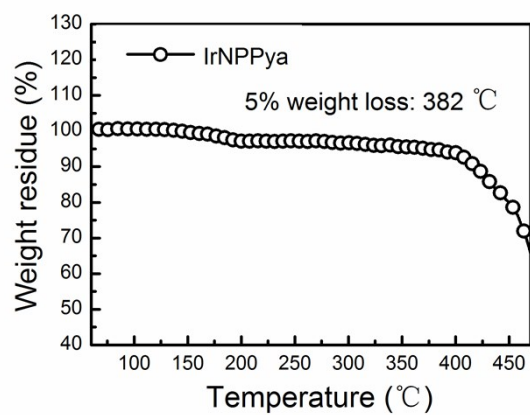

**Fig. S6.** Thermal gravimetric spectra of IrNPPya.

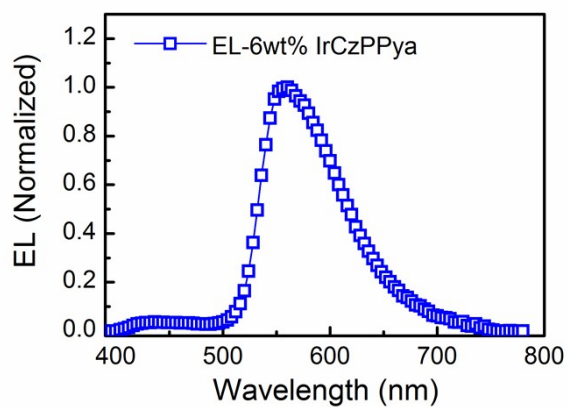

**Fig. S7.** Electroluminescence spectra of the device doped with IrCzPPya.

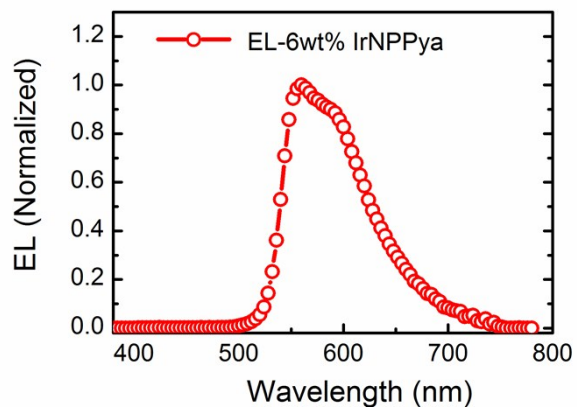

**Fig. S8.** Electroluminescence spectra of the device doped with IrNPPya.
